# Supplementary material for: Ordered mesoporous crystalline titania with high thermal stability from comb-like liquid crystal block copolymers
Source: Royal Society of Chemistry journal article supplement (doi:10.1039/c6ra10352a), 2016-01-01
Supplement: c6ra10352a1.pdf [file c6ra10352a1.pdf]

## Supporting Information

# Ordered mesoporous crystalline titania with high thermal stability from comb-like liquid crystal block copolymers

*Shubo Cao,<sup>a</sup> Yongbin Zhao,<sup>b</sup> Ting Qu,<sup>a</sup> Pingping Wang,<sup>a</sup> Song Guan,<sup>a</sup> Yawei Xu,<sup>a</sup> Fan Rao,<sup>a</sup> Yayuan Li,<sup>a</sup> Aihua Chen,<sup>a\*</sup> Tomokazu Iyoda<sup>c</sup>*

\*E-mail: [chenaihua@buaa.edu.cn](mailto:chenaihua@buaa.edu.cn)

<sup>a</sup> School of Materials Science and Engineering, Beihang University, Beijing 100191, P.R. China

<sup>b</sup> National Institute of Clean and Low Carbon Energy, Beijing 102209, P.R. China

<sup>c</sup> Division of Integrated Molecular Engineering, Chemical Resources Laboratory, Tokyo Institute of Technology, 4259 Nagatsuta-cho, Midoriku, Yokohama, Kanagawa 226-8503 Japan

## **Preparation of Amphiphilic PEO-*b*-PMA(Az) Diblock Copolymer.**

The amphiphilic PEO-*b*-PMA(Az) diblock copolymers were prepared by atom transfer radical polymerization (ATRP) method reported elsewhere previously. The synthesis route involved three steps, the preparation of macroinitiator PEO-Br, the preparation of azobezene monomer and the subsequent polymerization of azobezene monomer initiated by PEO-Br. In the first step, monomethoxy PEO-5000 (10 g) was dissolved in THF (30 ml). Then 0.30 g triethylamine were added to the solution, after cooled to 0 °C by ice-water bath, a solution of 0.56 g 2-bromo-2-methylpropionylbromide in 10 ml of dry THF was added dropwise under stirring for 1 h. And then the mixture was stirred at room temperature for 24 h. After the mixture was filtered, half of the solvent was evaporated, and the PEO-Br was precipitated into cold ether. After dissolution in methanol, the solution was stored in refrigerator to recrystallize the product. In the second step, 20 g 4-butylaniline was added into the round flask (500 ml), and subsequently 48.7 g concentrated HCl (37 wt %) was added. After ultrasonic, the mixture was cooled to below 5 °C. 30 ml solution containing 9.25 g sodium nitrite (NaNO<sub>2</sub>) was added dropwise under stirring for 30 min to obtain the diazonium salts. 7.9 g phenol was dissolved in 75 ml solution containing 12.96 g potassium hydroxide (KOH). Once completely dissolved, the obtained diazonium salts were added dropwise and the pH value was kept about 9. After reaction for 1 h, the pH value was adjusted to 6 ~ 7 by using HCl. Claybank precipitations (denoted as P1) were obtained. 8.6 g P1, 8.5 g 11-bromoundecanol, 14.22 g potassium carbonate (K<sub>2</sub>CO<sub>3</sub>), 0.39 g potassium iodide (KI) and 150 ml acetone were successively added

into the 250 ml round flask, and then the mixture was refluxed at 75 °C for 12 h. After rinsing and drying, the product (denoted as P2) was obtained. 10 g P2 and 2.97 g triethylamine were added into 150 ml THF in ice-water bath, and then 3.07 g methacryloyl chloride was added dropwise under stirring for 1 h. Finally, the mixture was stirred at room temperature for 12 h. After filtering, rinsing and dry, azobezene monomers (denoted as MA(Az) )were obtained. In the third step, 0.5 g PEO-Br, 1.5 g MA(Az), 4 ml chlorobenzene, 26.36 µl HMTETA and 9.95 mg CuCl were added to an ampoules bottle. The bottle, containing reactants, was fully degassed with three freeze-pump-thaw cycles and sealed under vacuum. It was subsequently immersed in a thermostated oil bath at 80 °C under stirring to allow polymerization of MA(Az) for 20 h. The solution was passed through a neutral Al<sub>2</sub>O<sub>3</sub> column with THF as eluent to remove the catalyst. The yellow filtrate was concentrated under reduced pressure and reprecipitated twice into acidic methanol. The yellow polymer (PEO-*b*-PMA(Az)) was collected by filtration and dried under vacuum.

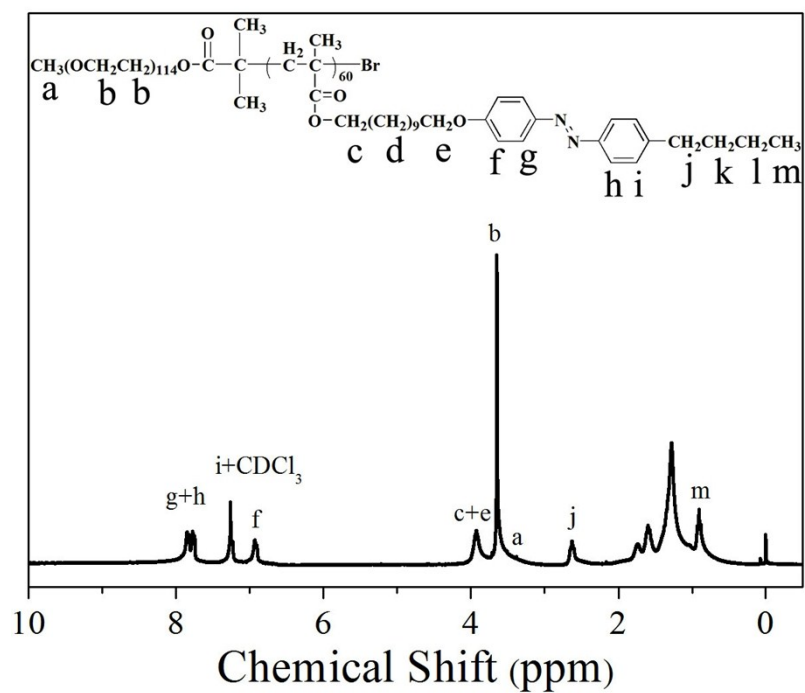

Fig. S1 Typical  $^1\text{H}$  NMR spectrum of block copolymer PEO-*b*-PMA(Az) in  $\text{CDCl}_3$ .

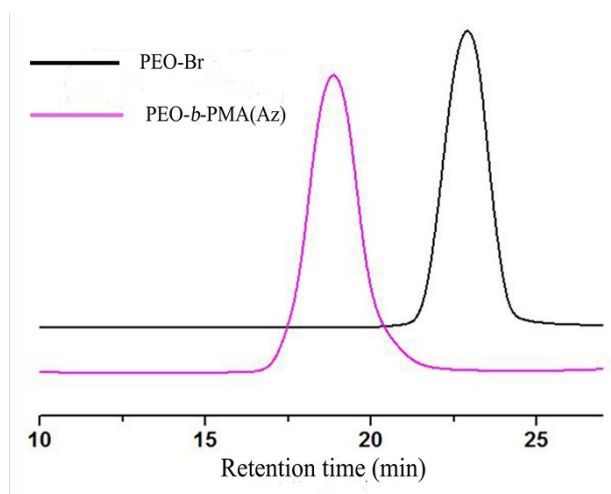

Fig. S2 GPC trace of PEO-Br and the lab-made diblock copolymer PEO-*b*-PMA(Az) using THF as an eluent.

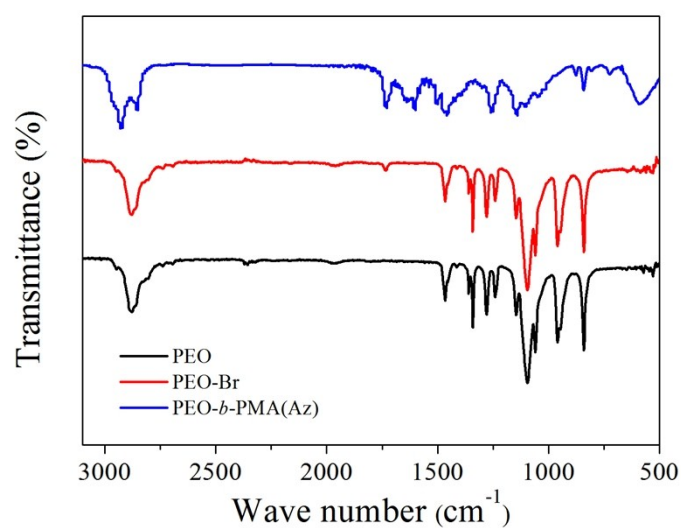

Fig. S3 FT-IR spectra of PEO, PEO-Br and PEO-*b*-PMA(Az).

Compared with PEO, a carbonyl stretch occurs at  $1740\text{ cm}^{-1}$  in PEO-Br. After the polymerization of MA(Az), the adsorption peak of PEO-*b*-PMA(Az) at  $1740\text{ cm}^{-1}$  increases, indicating the relative ratio of carbonyl obviously increases, due to the ester bond in PMA(Az). Due to the azobenzene in PMA(Az), the stretches of benzene skeleton at  $1600\text{ cm}^{-1}$  and  $1500\text{ cm}^{-1}$  occurs. Both indicate the presence of PMA(Az) block in the PEO-*b*-PMA(Az).

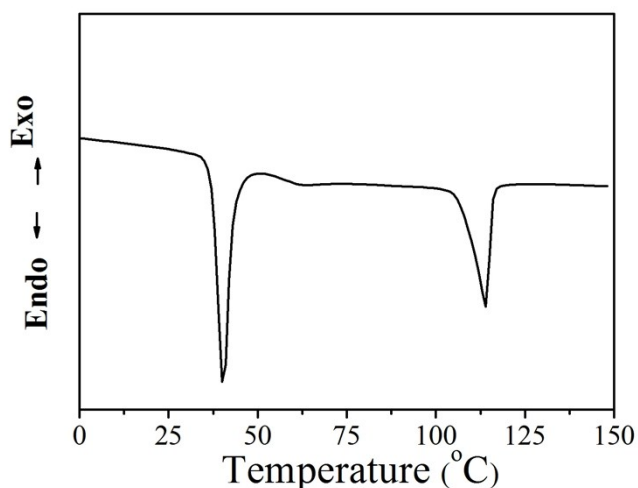

Fig. S4 DSC curve of PEO-*b*-PMA(Az) on the second heating process.

The sharp peak at  $40\text{ °C}$  is the melting peak of PEO. Two endothermic transitions at  $62$  and  $113\text{ °C}$  are observed, which are attributed to LC transitions.

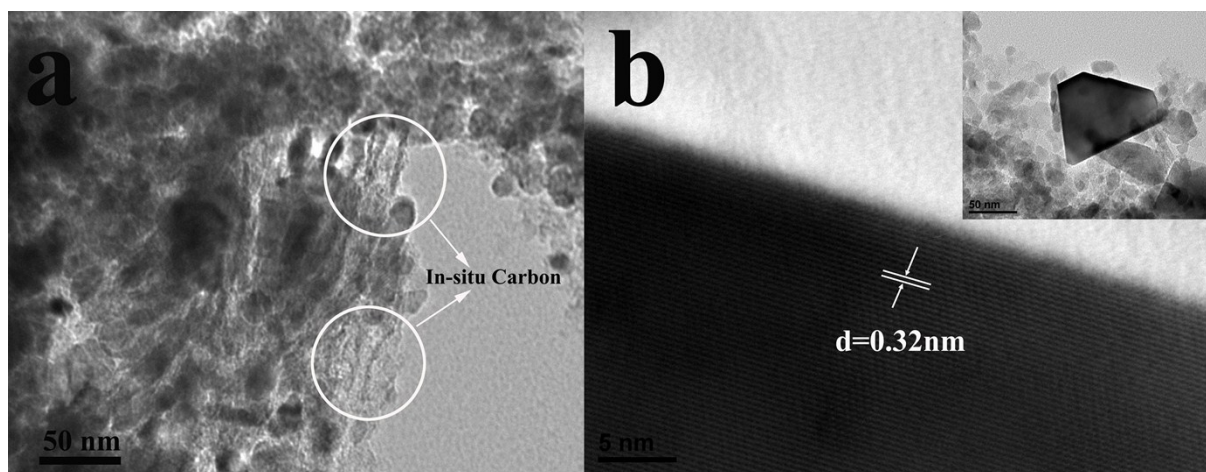

Fig. S5 TEM images of MT-800N.

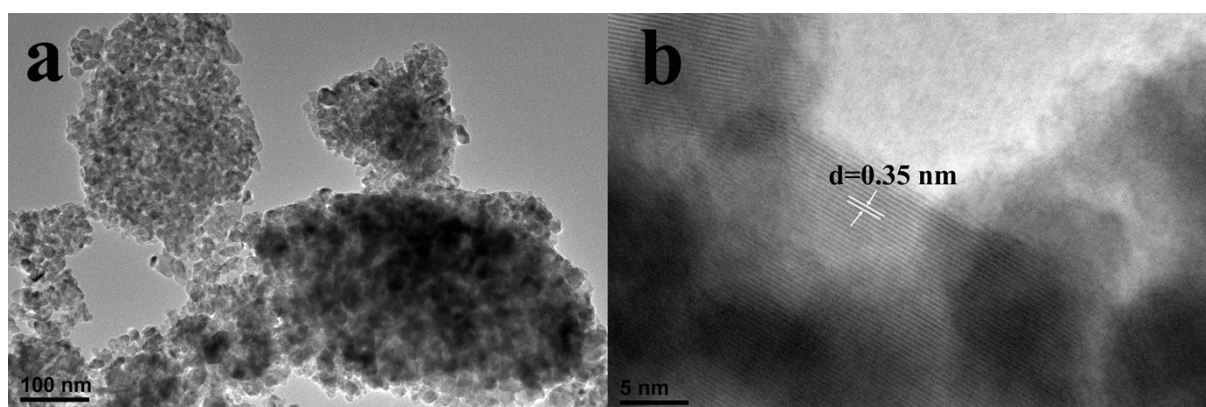

Fig. S6 TEM images of the as-made sample directly calcined at 600 °C in air (denoted as MT-600A).

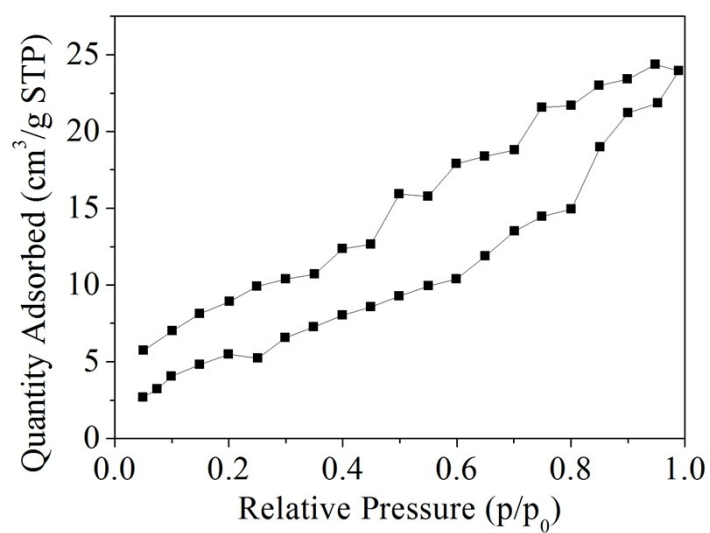

Fig. S7 Nitrogen adsorption-desorption isotherm of MT-350N.

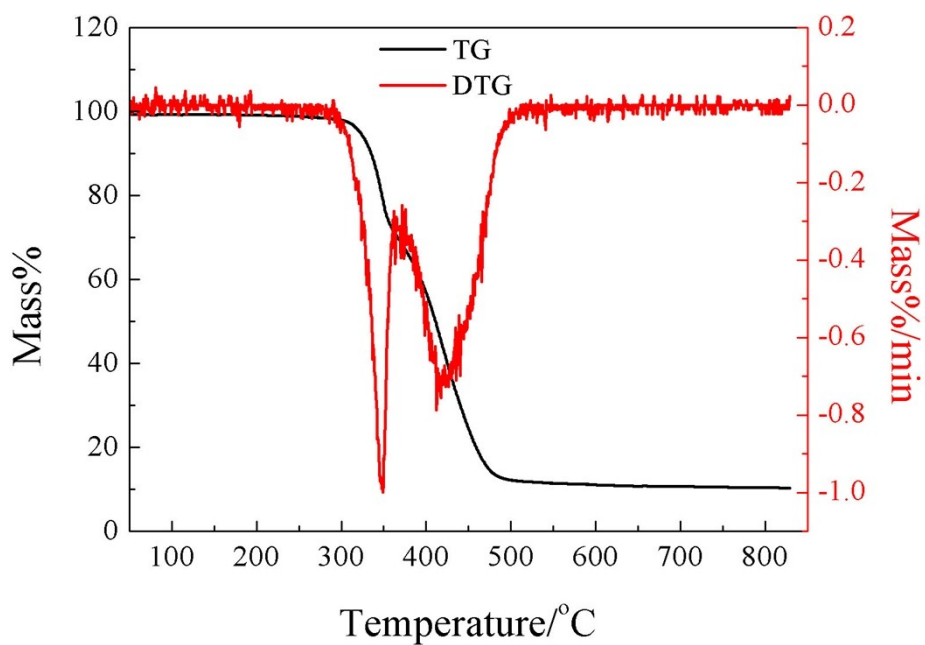

Fig. S8 TG curves of PEO-*b*-PMA(Az) in nitrogen atmosphere.

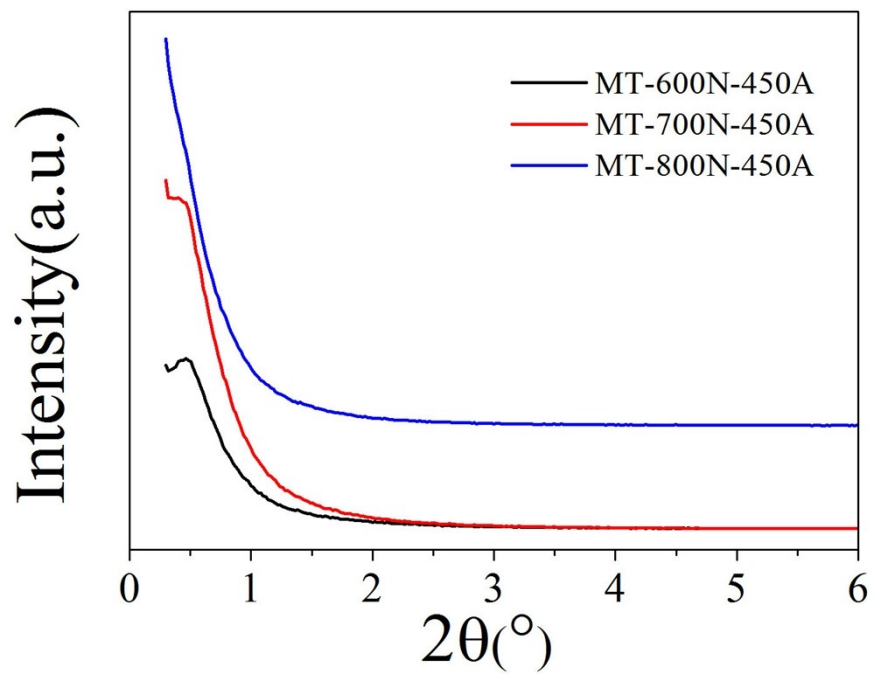

Fig. S9 SAXRD patterns of mesoporous titanias calcined at 450 °C in air.

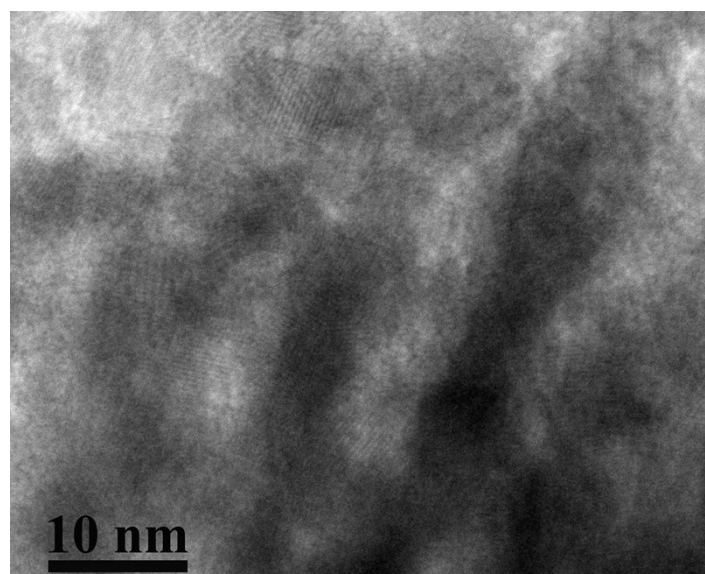

Fig. S10 HRTEM images of MT-600N-450A



**Table S1. Physicochemical properties of mesoporous titania materials.**

|              | BET surface<br>area<br>(m <sup>2</sup> /g) | Pore<br>volume<br>(cm <sup>3</sup> /g) | Pore size<br>(nm) | Crystallite size <sup>a)</sup><br>(nm)        | d <sub>100</sub> <sup>b)</sup><br>(nm) | a <sup>c)</sup><br>(nm) |
|--------------|--------------------------------------------|----------------------------------------|-------------------|-----------------------------------------------|----------------------------------------|-------------------------|
| MT-350N      | 21                                         | -                                      | -                 | 7.0                                           | 19.6                                   | 17.0                    |
| MT-600N      | 165                                        | 0.13                                   | 2.55,4.73         | 9.0                                           | 16.8                                   | 14.5                    |
| MT-700N      | 193                                        | 0.17                                   | 4.87              | 9.7                                           | 16.2                                   | 14.0                    |
| MT-800N      | 239                                        | 0.23                                   | 2.37              | 14.7(A) <sup>d)</sup> , 25.0(R) <sup>e)</sup> | -                                      | -                       |
| MT-600N-450A | 126                                        | 0.28                                   | 3.27              | 11.5                                          | 19.0                                   | 16.4                    |
| MT-700N-450A | 137                                        | 0.32                                   | 4.78              | 12.4                                          | 18.4                                   | 15.9                    |
| MT-800N-450A | 108                                        | 0.37                                   | 4.81              | 15.9(A), 29.6(R)                              | -                                      | -                       |
| T-700N-450A  | 33                                         | 0.01                                   | 5.82              | 20.5                                          | -                                      | -                       |

<sup>a)</sup> The sizes were calculated from the 101 reflection for anatase and 110 reflection for rutile in the WAXRD patterns; <sup>b)</sup> d values were calculated using the Bragg equation; <sup>c)</sup> the unit-cell parameters were calculated using the formula  $a = \sqrt{3} d_{100}/2$ ; <sup>d)</sup> A refers to anatase phase; <sup>e)</sup> R refers to rutile phase.
